# Supplementary material for: TNFAIP8 promotes prostate cancer cell survival by inducing autophagy
Source: Oncotarget. 2018 Jun 1;9(42):26884–99. doi: 10.18632/oncotarget.25529 (PMC6003558; doi:10.18632/oncotarget.25529)
Supplement: Supplementary file 1 [file oncotarget-09-26884-s001.pdf]

# TNFAIP8 promotes prostate cancer cell survival by inducing autophagy

## SUPPLEMENTARY MATERIALS

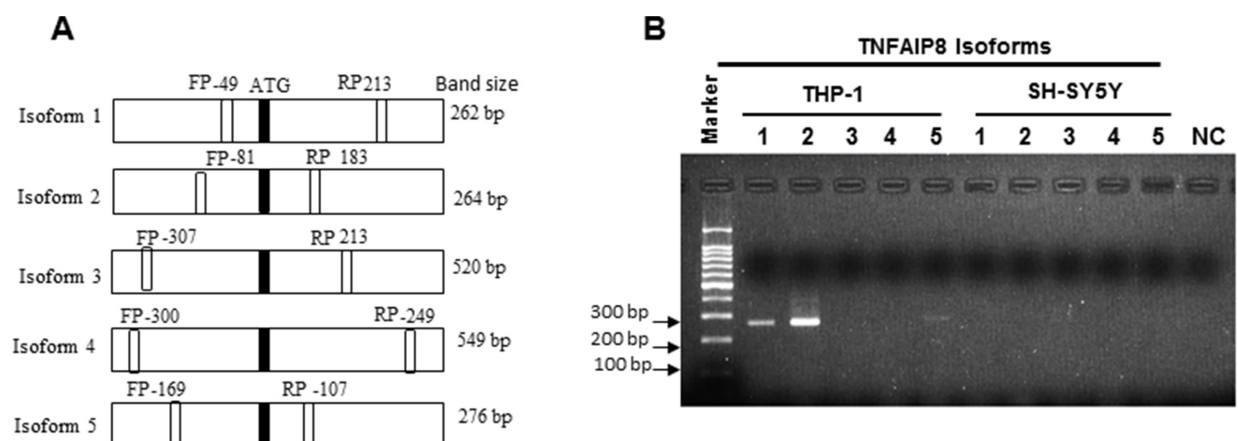

**Supplementary Figure 1: Designing the forward and reverse primers to analyze the expression of TNFAIP8 isoforms.** (A) A schematic of the forward and reverse primer design process. (B) RT-PCR of total RNA from human monocytic leukemia THP-1 cells and human neuroblastoma SH-SY5Y cells. RNA of the five isoforms was amplified, and PCR products were electrophoresed on a 1.5% agarose gel stained with ethidium bromide. NC—negative control (no cDNA).

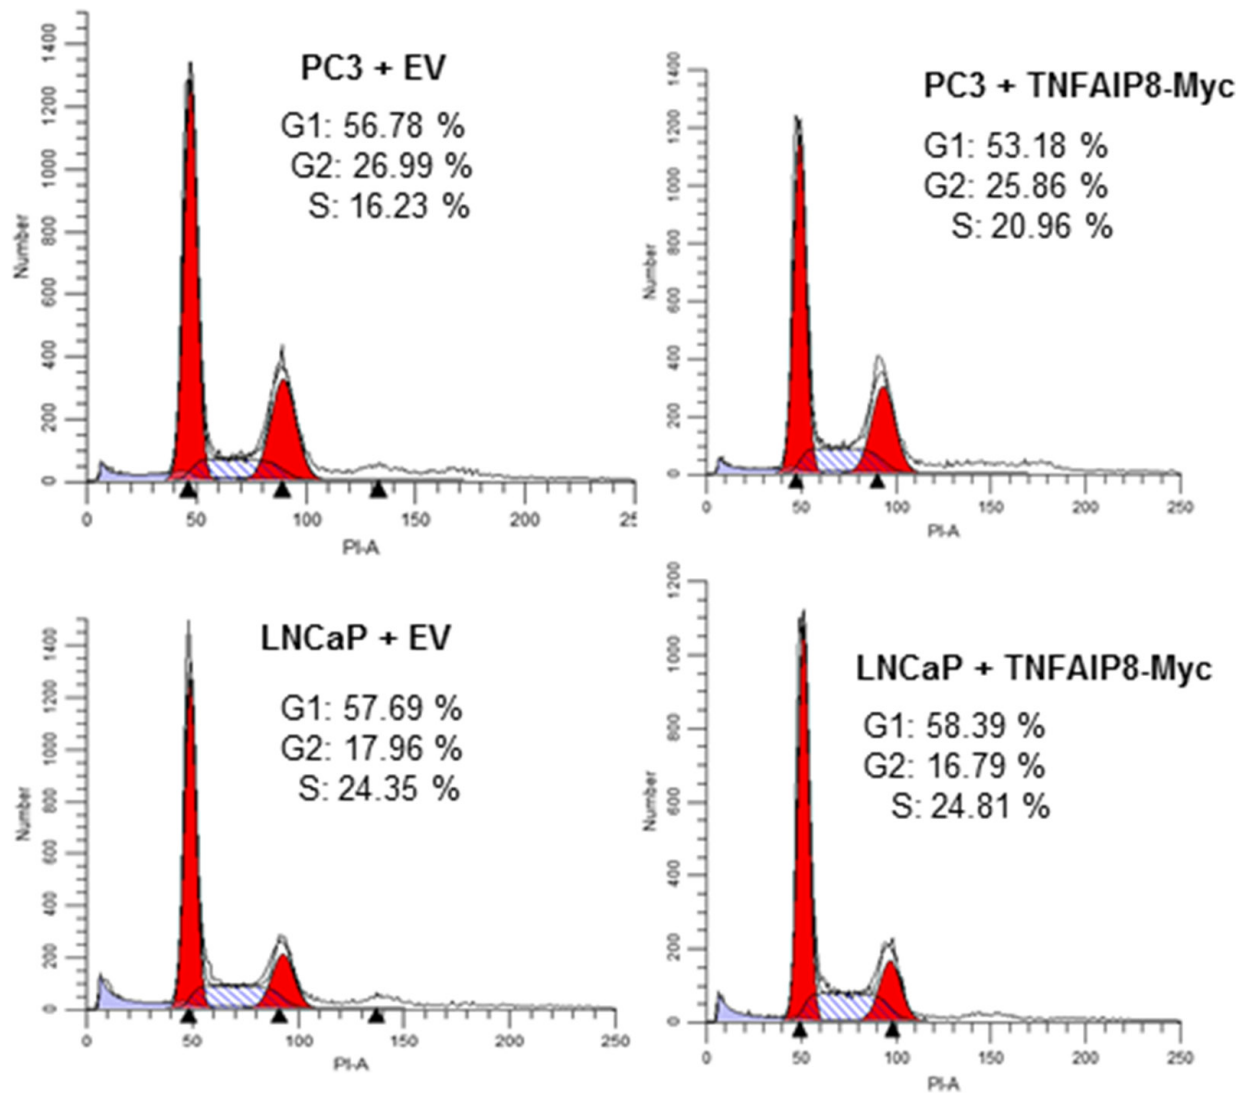

**Supplementary Figure 2: The effect of TNFAIP8 expression on cell cycle progression.** PC3 and LNCaP cells were transfected with empty vector or TNFAIP8-Myc plasmid for 30 h. Cells were stained with propidium iodide, and cell-cycle progression was monitored using flow cytometry. The percentages of cells in the G1, G2, and S phases were measured.

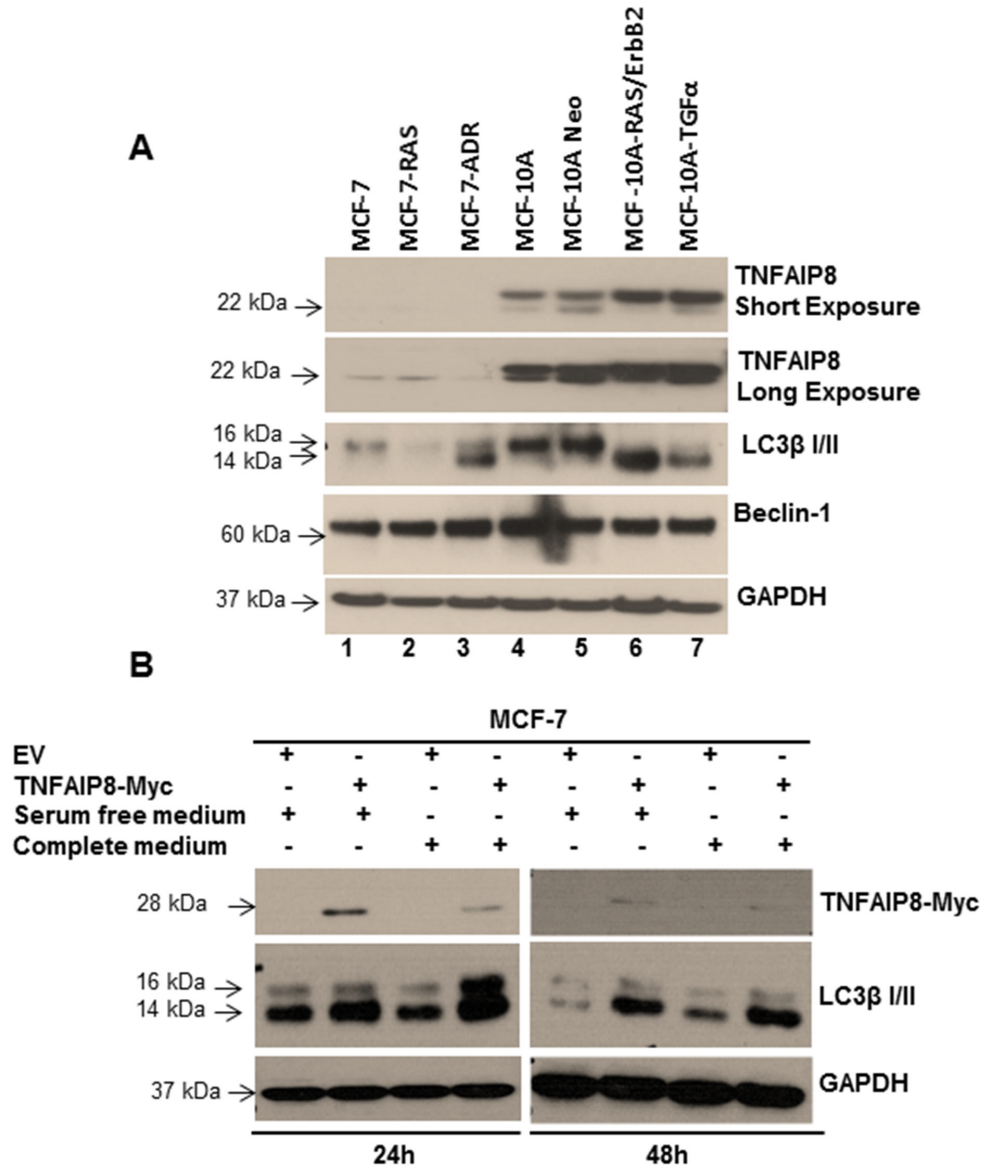

**Supplementary Figure 3: TNFAIP8 expression is associated with LC3  $\beta$  I/II expression in normal and breast cancer cells.** (A) MCF7, MCF7-RAS, MCF7-ADR, MCF10A, MCF10A-Neo, MCF10A-RAS, MCF-10A-TGF $\alpha$  cells were grown for 30 h and cell lysates were immunoblotted with anti-TNFAIP8, anti-LC3 $\beta$  I/II, anti-Becclin1, and anti-GAPDH antibodies. (B) MCF7 cells were transfected with empty vector or TNFAIP8-Myc plasmid. After 18 h, the medium was changed to serum-free (SF) medium or complete medium for an additional 24 h and 48 h. Cell extracts (40  $\mu$ g) were immunoblotted with anti-Myc, anti-LC3 $\beta$  I/II, and anti-GAPDH antibodies as indicated.

**Supplementary Table 1: The following primer sets were used for RT/qPCR analysis of TNFAIP8 and cell cycle-related gene expression**

|                                             |
|---------------------------------------------|
| TNFAIP8 FP: 5'- CTTTGACCGGAATGTGTTATCCA -3' |
| TNFAIP8 RP: 5'- CAAGGCAGCCAAAAATTCACAA -3'  |
| CDK2 FP: 5'- CCAGGAGTTACTTCTATGCCTGA -3'    |
| CDK2 RP: 5'- TTCATCCAGGGGAGGTACAAC -3'      |
| CDC20 FP: 5'- GCACAGTTCGCGTTCGAGA -3'       |
| CDC20 RP: 5'- CTGGATTTGCCAGGAGTTCGG -3'     |
| MAD2L1 FP: 5'-GGACTCACCTTGCTTGTAACCTAC -3'  |
| MAD2L1 RP: 5'-GATCACTGAACGGATTTCATCCT -3'   |
| CDT1 FP: 5'- CGGTGGACGAGGTTTCCAG -3'        |
| CDT1 RP: 5'-CTGCCGGGGTGGATTCTT -3'          |
| PCNA FP: 5'- AACTAAGGGCCGAAGATAACG -3'      |
| PCNA RP: 5'- ACAGCATCTCCAATATGGCTGA -3'     |
| CHEK1 FP: 5'- ATATGAAGCGTGCCGTAGACT -3'     |
| CHEK1 RP: 5'- TGCCTATGTCTGGCTCTATTCTG -3'   |
| CCNE2 FP: 5'- TCAAGACGAAGTAGCCGTTTAC -3'    |
| CCNE2 RP: 5'- TGACATCCTGGGTAGTTTTCCTC -3'   |
| CCNB2 FP: 5'-TGCTCTGCAAAATCGAGGACA -3'      |
| CCNB2 RP: 5'-GCCAATCCACTAGGATGGCA -3'       |
| CCNA2 FP: 5'- CGCTGGCGGTACTGAAGTC -3'       |
| CCNA2 RP: 5'- GAGGAACGGTGACATGCTCAT -3'     |
| CDCA4 FP: 5'- GAGATGACGCAGGATGGGAC -3'      |
| CDCA4 RP: 5'- TCCACGTCTGAGAACAGCTCT -3'     |
| CDC45 FP: 5'- GCACAGTTCGCGTTCGAGA -3'       |
| CDC45 RP: 5'- CTGGATTTGCCAGGAGTTCGG -3'     |
| GAPDH FP: 5'- CCACCCAGAAGACTGTGGAT -3'      |
| GAPDH RP: 5'- GTTGAAGTCAGAGGAGACCACC -3'    |
